# Supplementary material
Source: Springer Nature journal article supplement (https://www.springermedizin.de/resource/supplementary/12985_2014_2480_MOESM3_ESM.pdf/9606828)

**A****EIAV GagPol**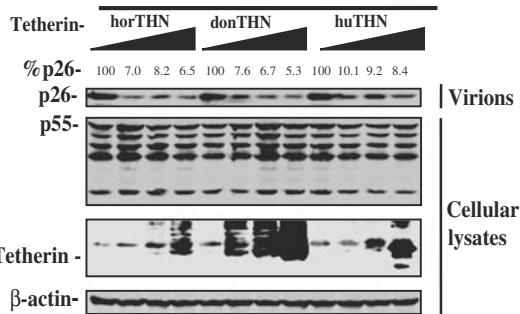**B****pNL4-3 $\Delta$ Env Hsas**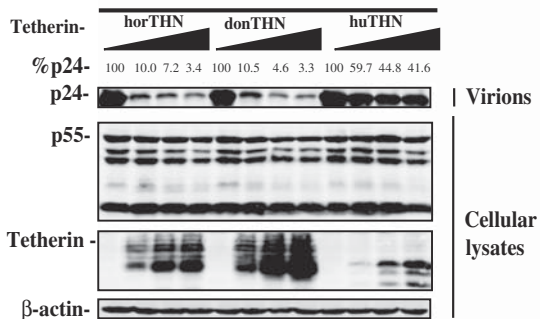**C**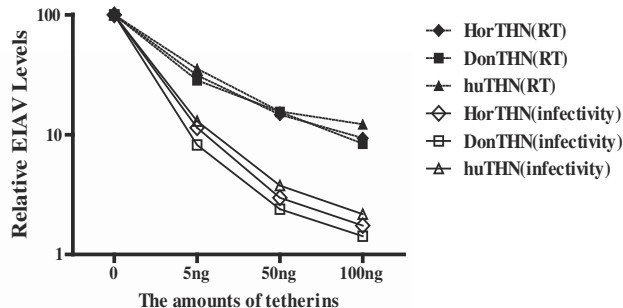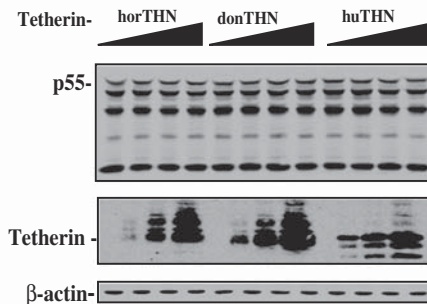

Supplement: MOESM3 [file 9606828]
